# Supplementary material for: Disturbed angiogenic activity of adipose-derived stromal cells obtained from patients with coronary artery disease and diabetes mellitus type 2
Source: Springer Nature journal article supplement (doi:10.1186/s12967-014-0337-4), 2014-12-01

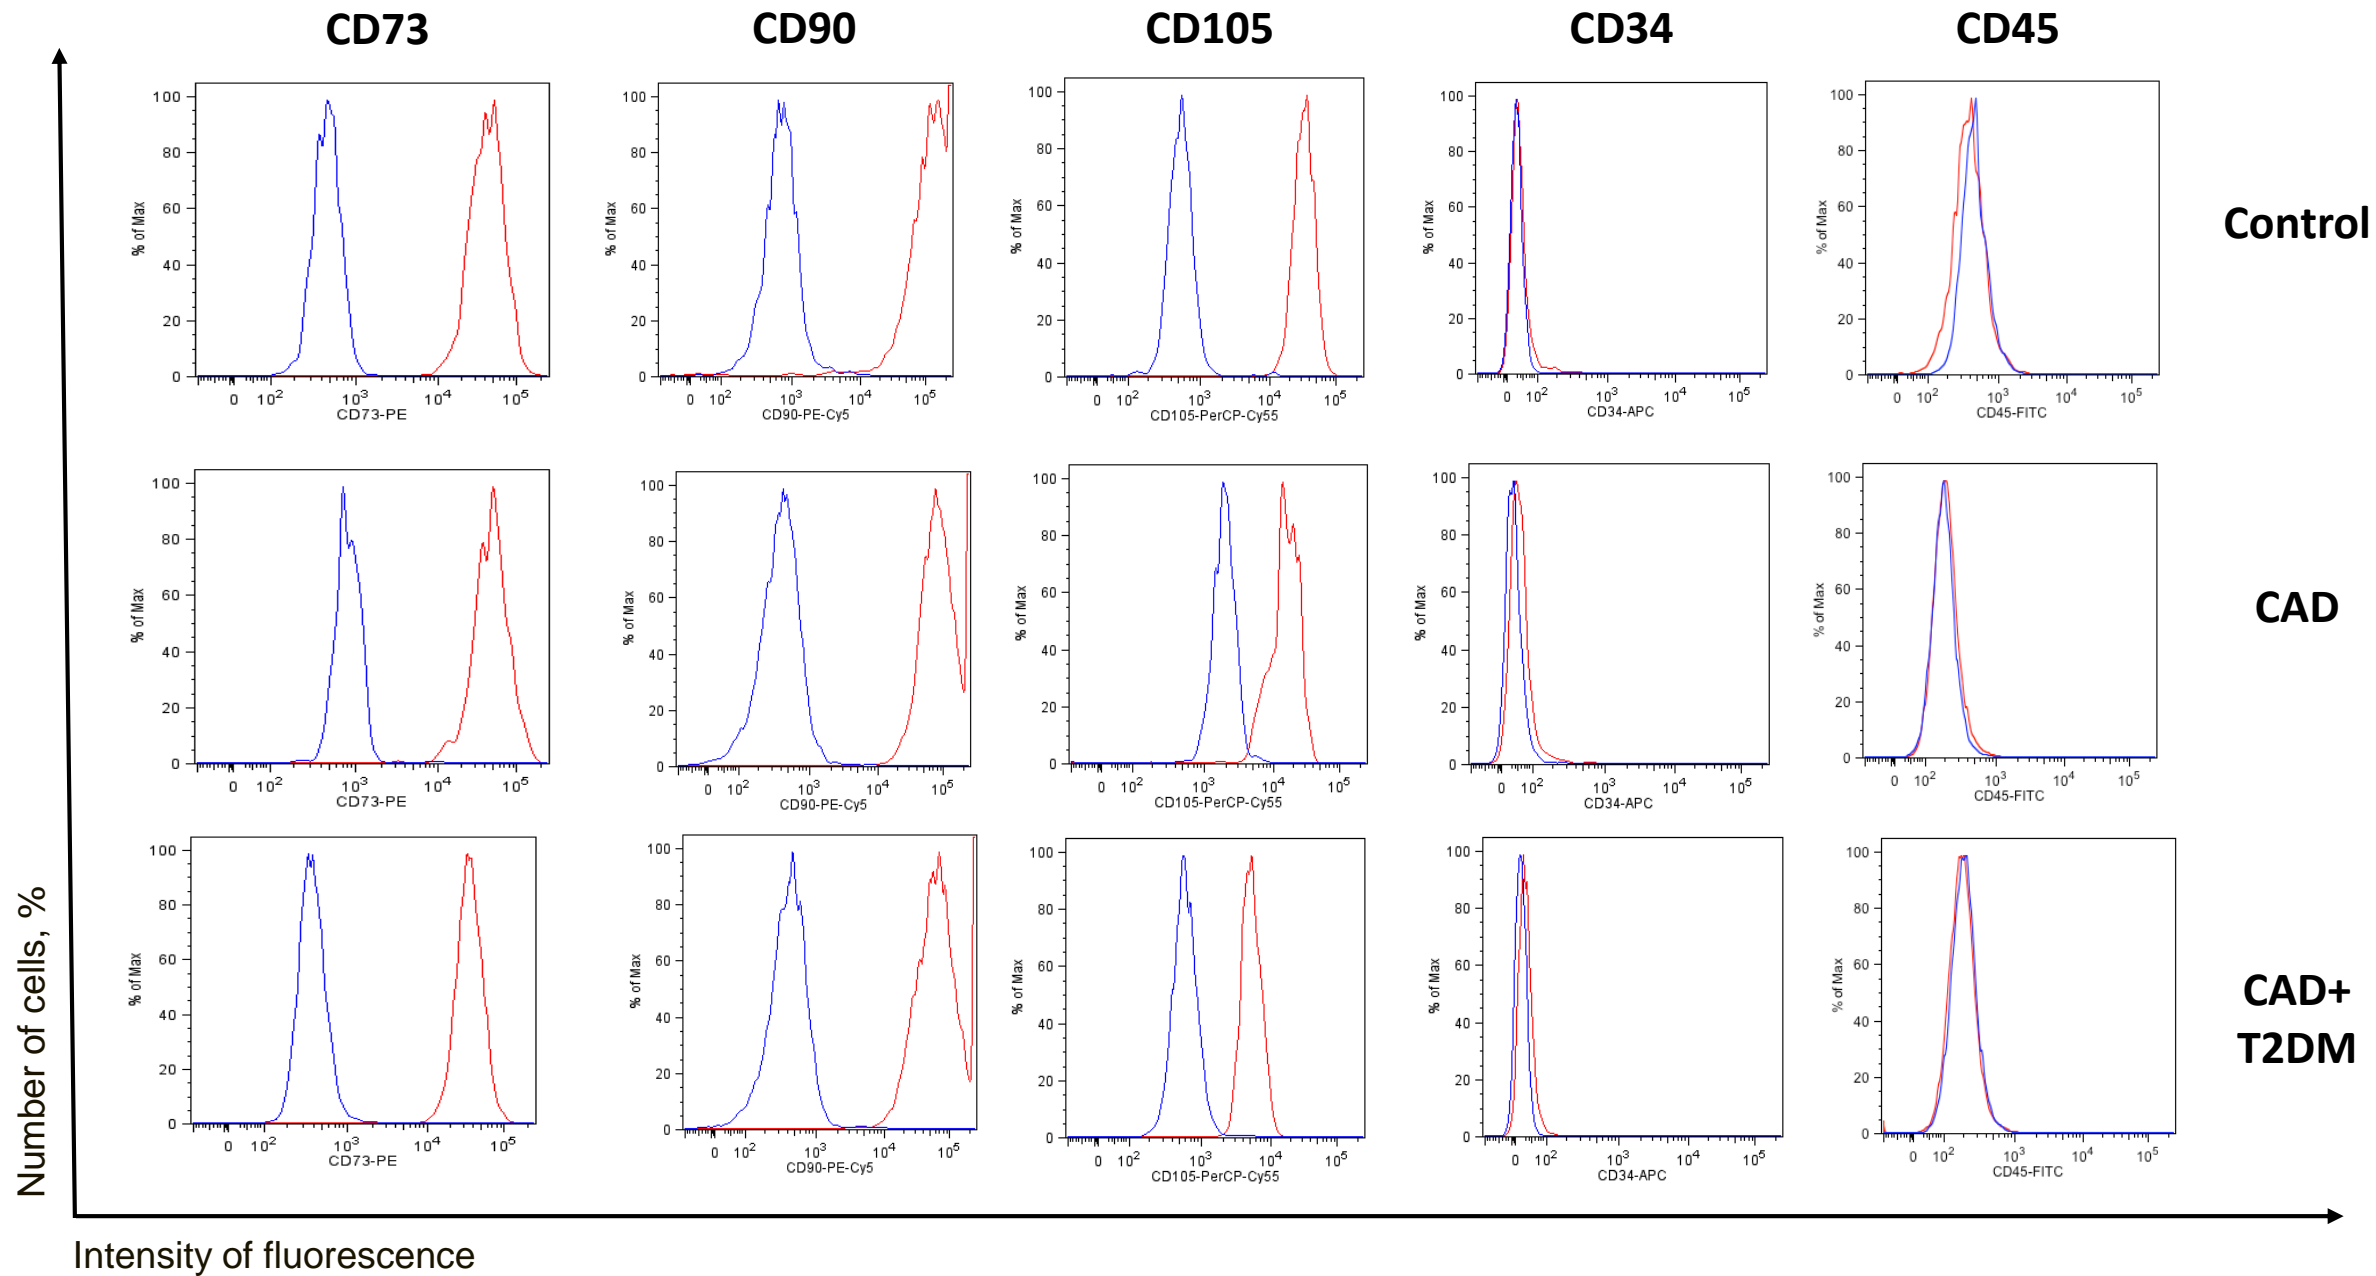

Supplement: MOESM2 [file 9766528]
