# Supplementary material for: Disturbed angiogenic activity of adipose-derived stromal cells obtained from patients with coronary artery disease and diabetes mellitus type 2
Source: Springer Nature journal article supplement (doi:10.1186/s12967-014-0337-4), 2014-12-01
Supplement: MOESM3 [file 9766528]

**PDGFRB**

**NG2**

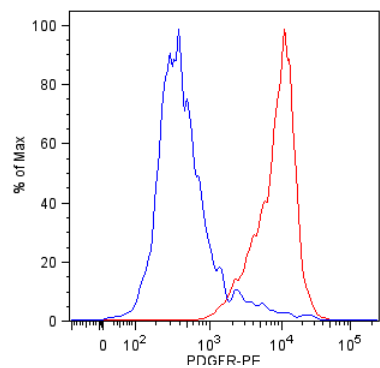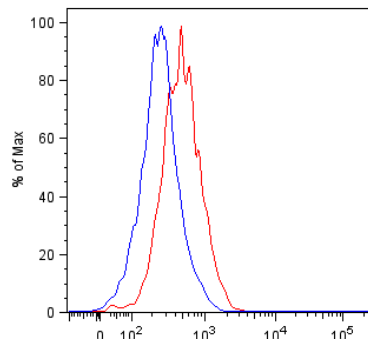

**Control**

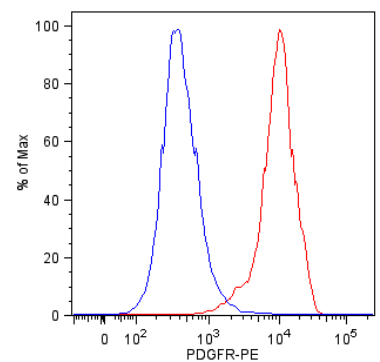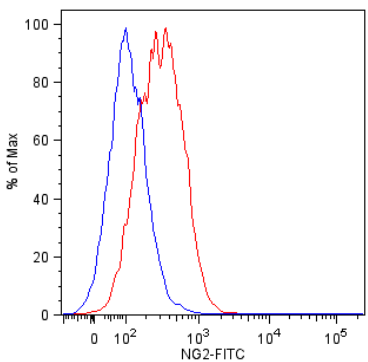

**CAD**

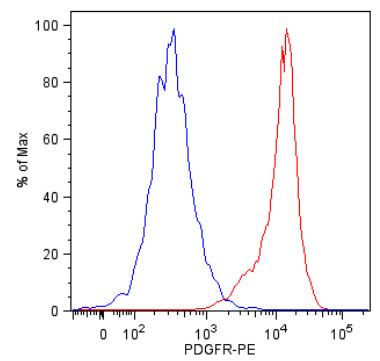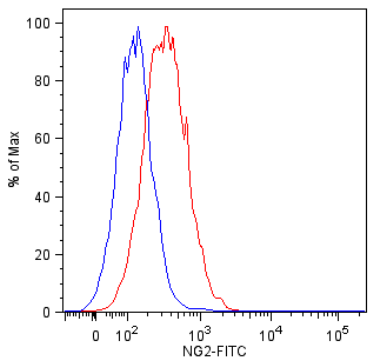

**CAD+  
T2DM**

Number of cells, %

Intensity of fluorescence
